# Supplementary material
Source: PubMed Central journal article supplement (PMC5987229)

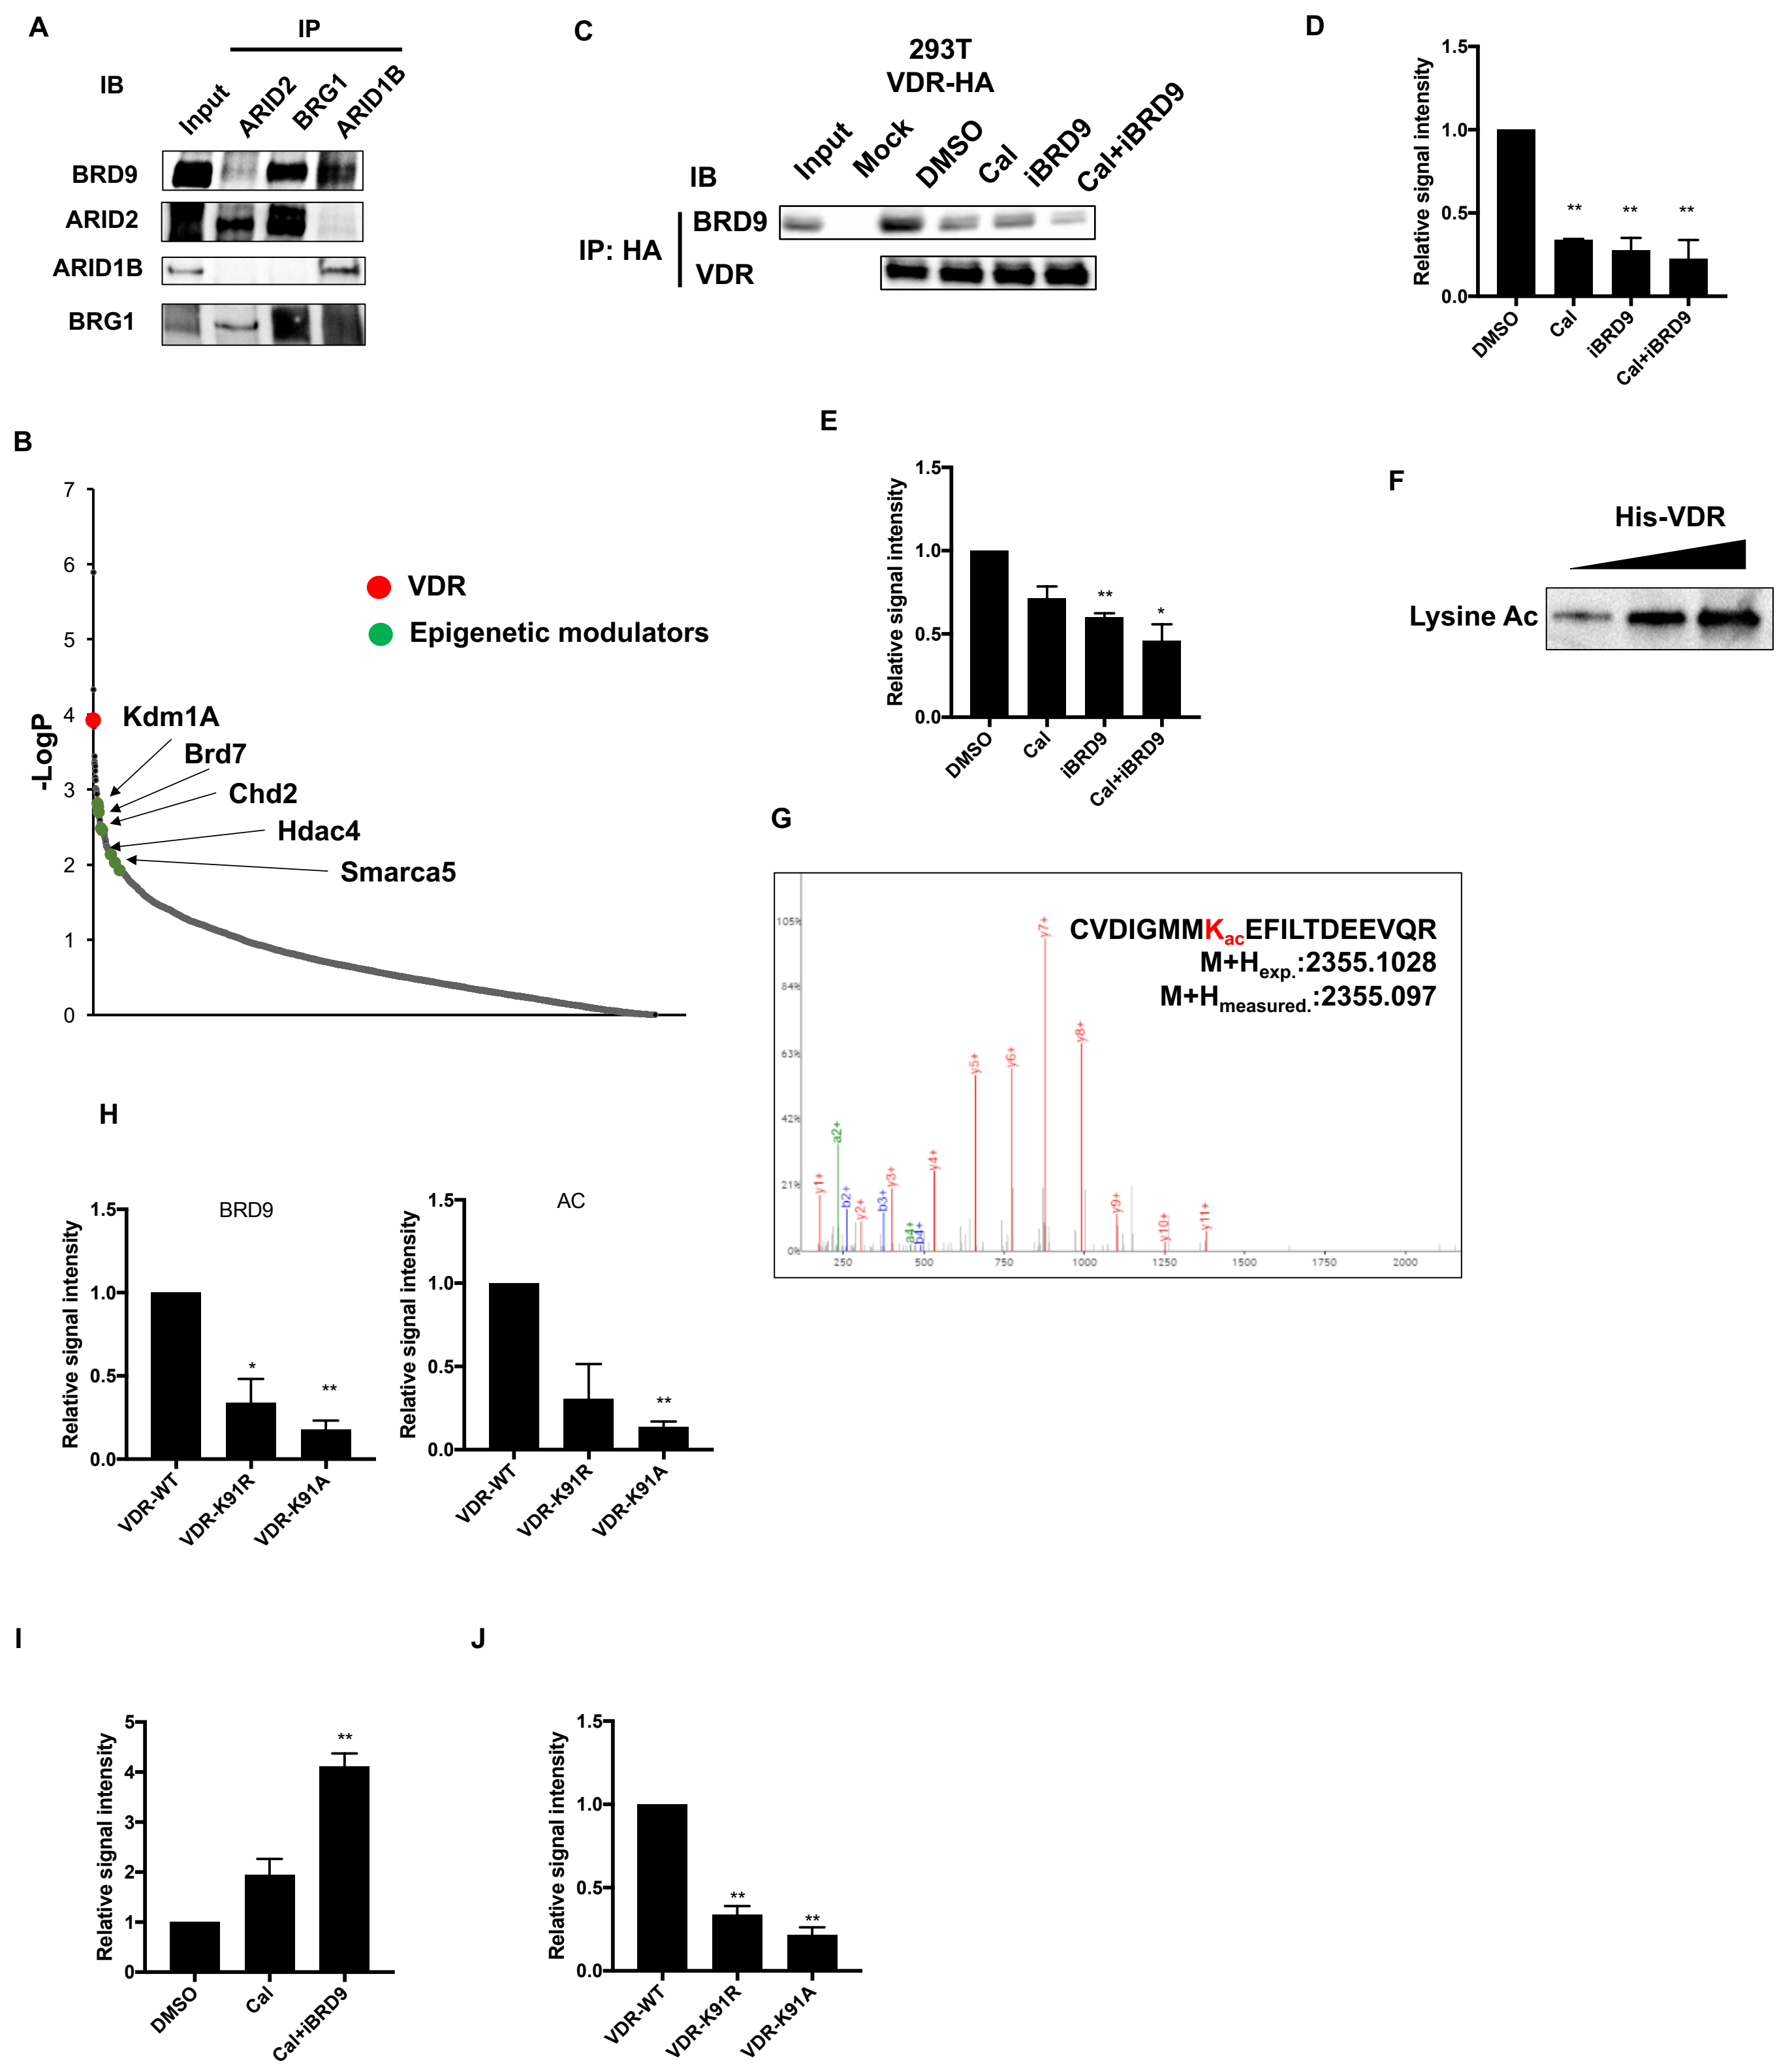

Figure S3

Supplement: NIHMS961666-supplement-3.pdf [file NIHMS961666-supplement-3.pdf]

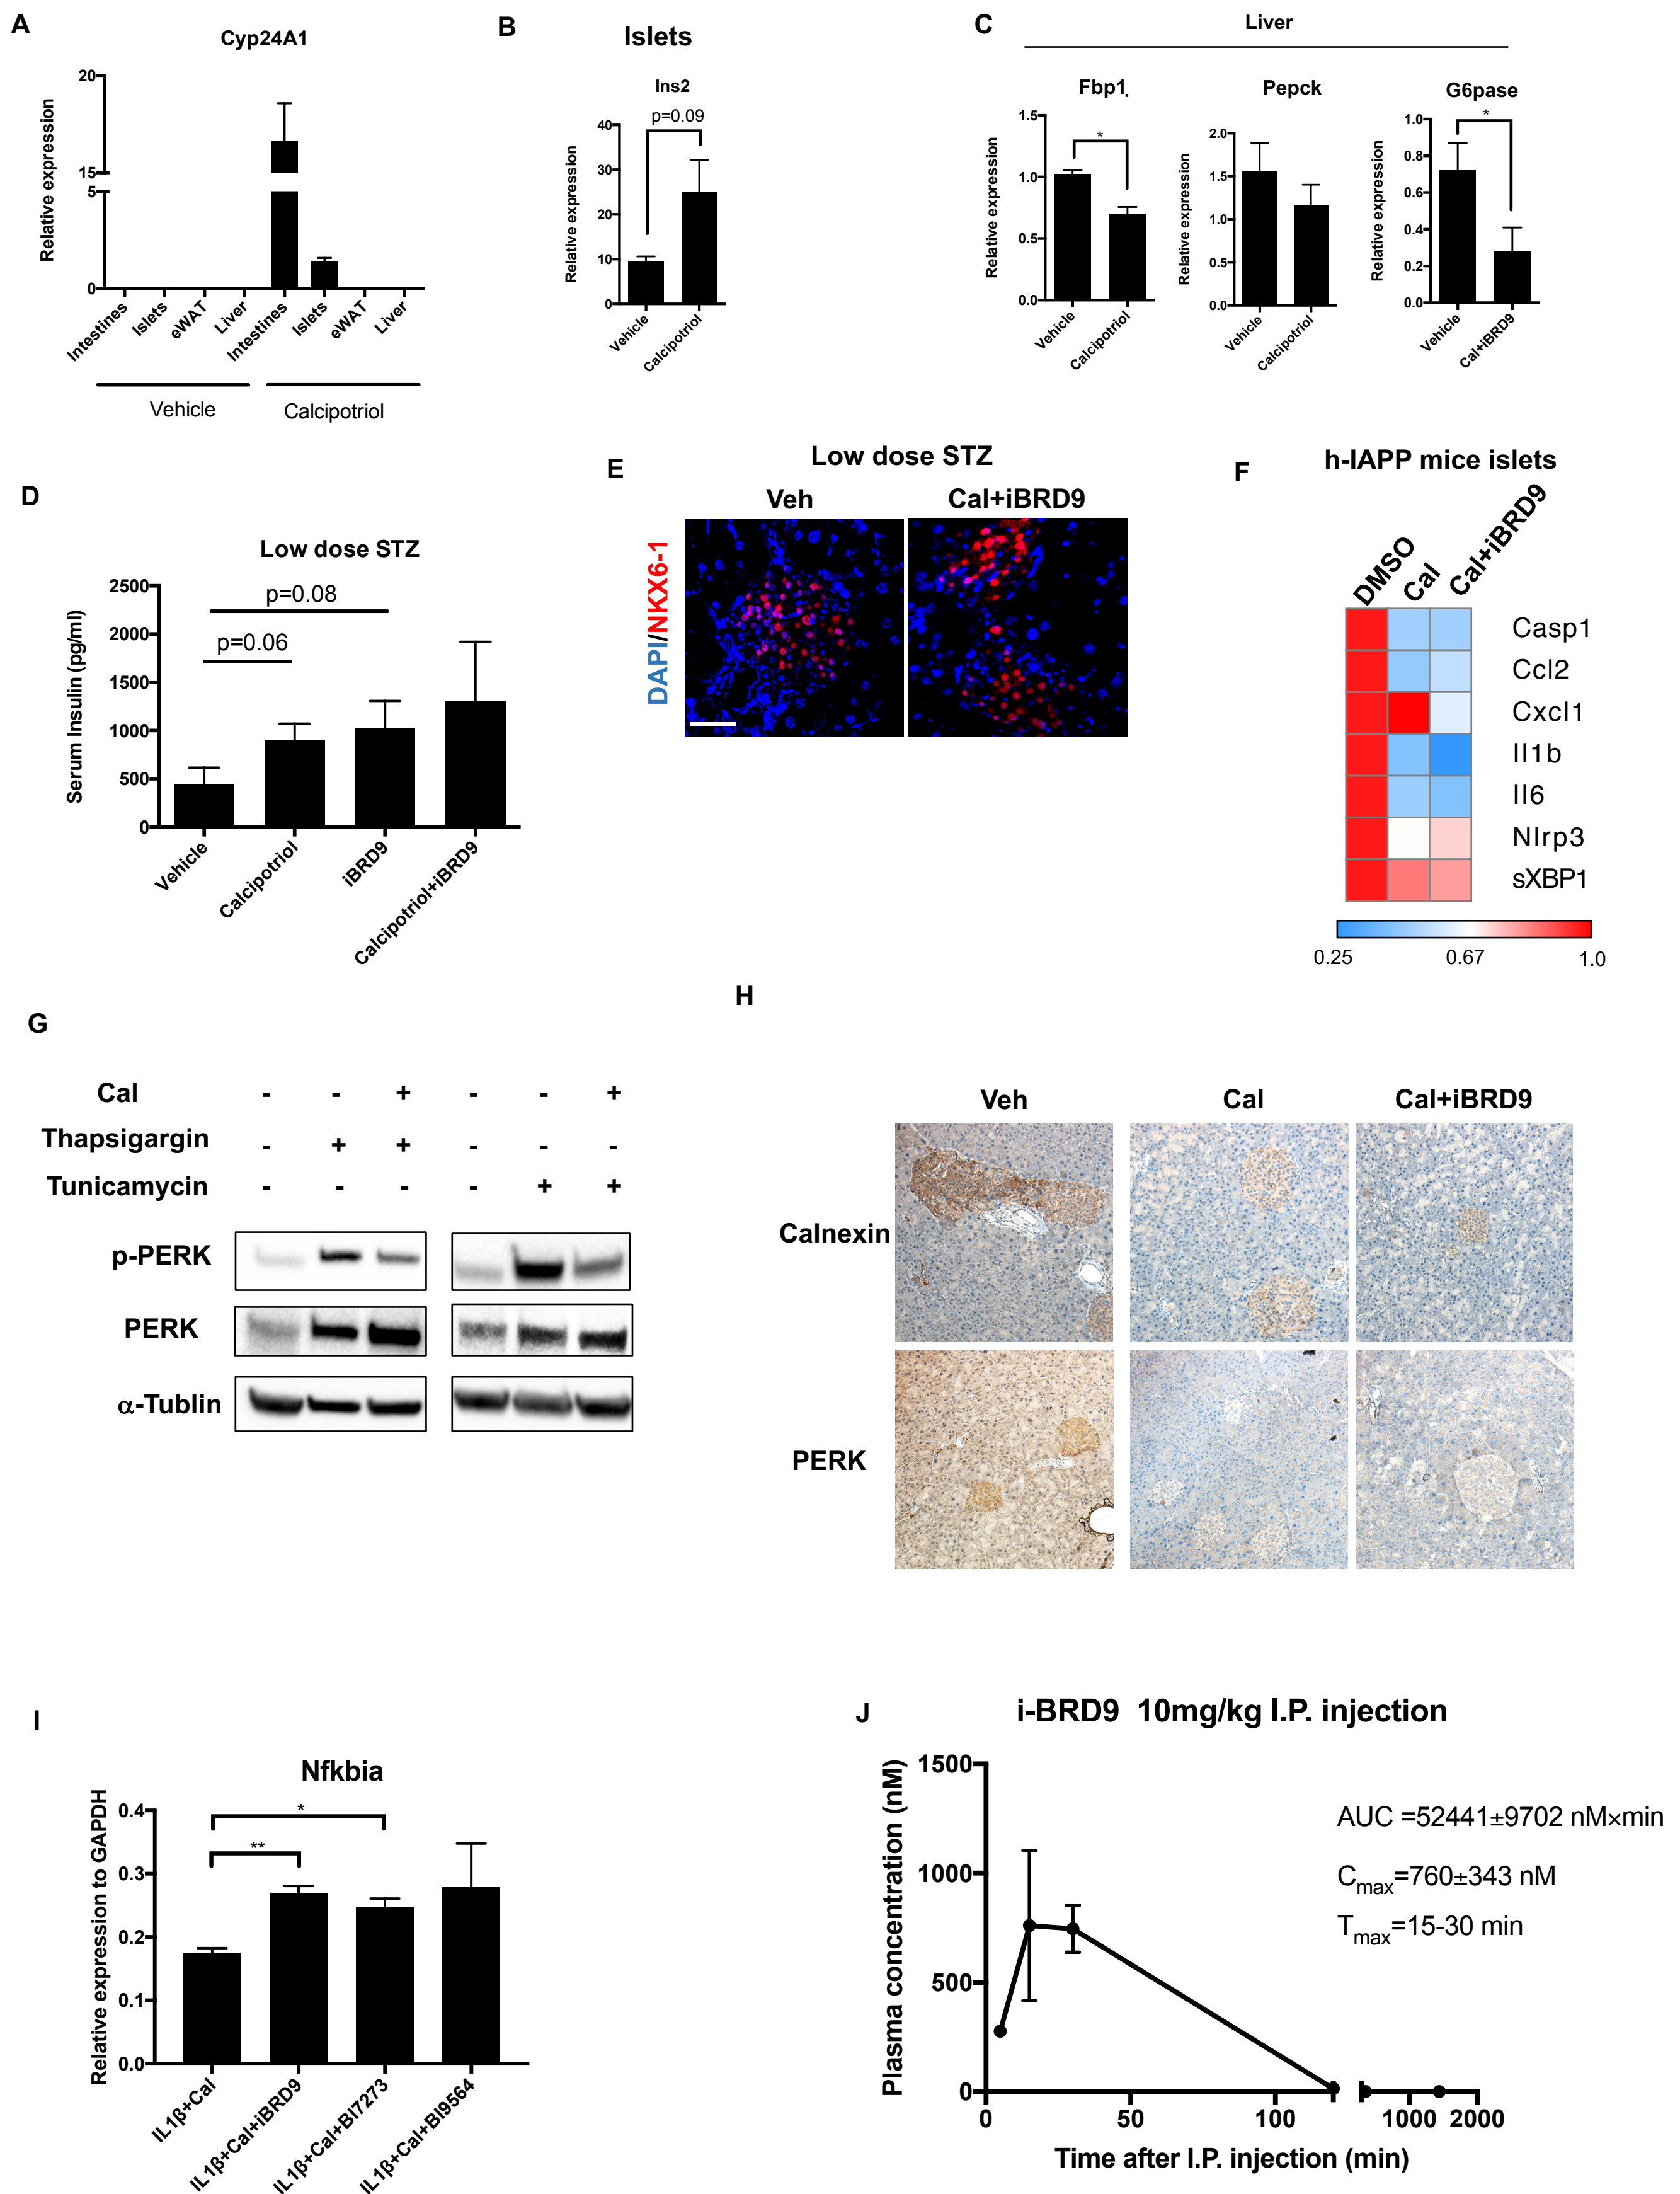

Figure S6

Supplement: NIHMS961666-supplement-6.pdf [file NIHMS961666-supplement-6.pdf]

A

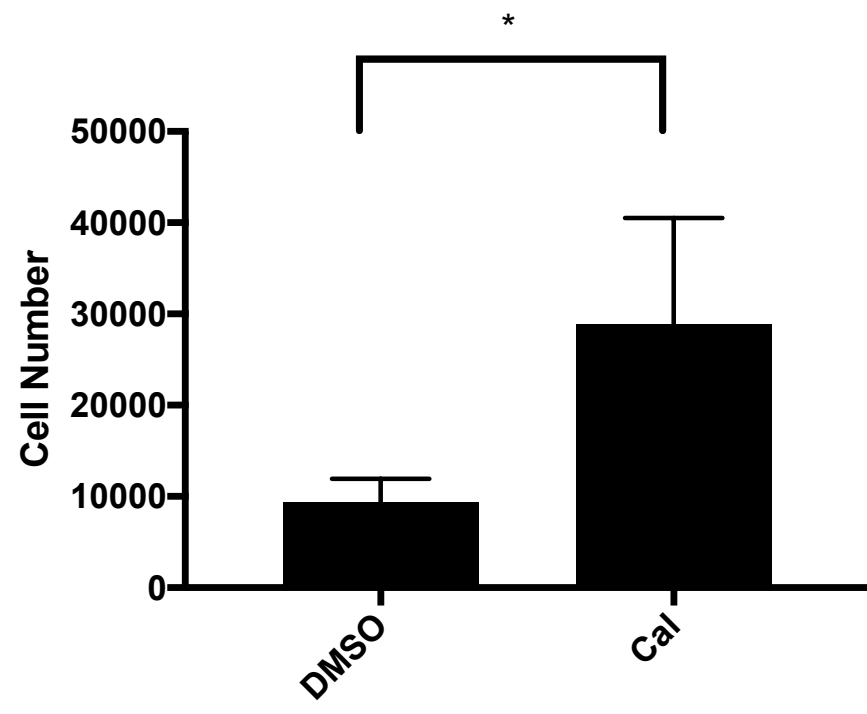

B

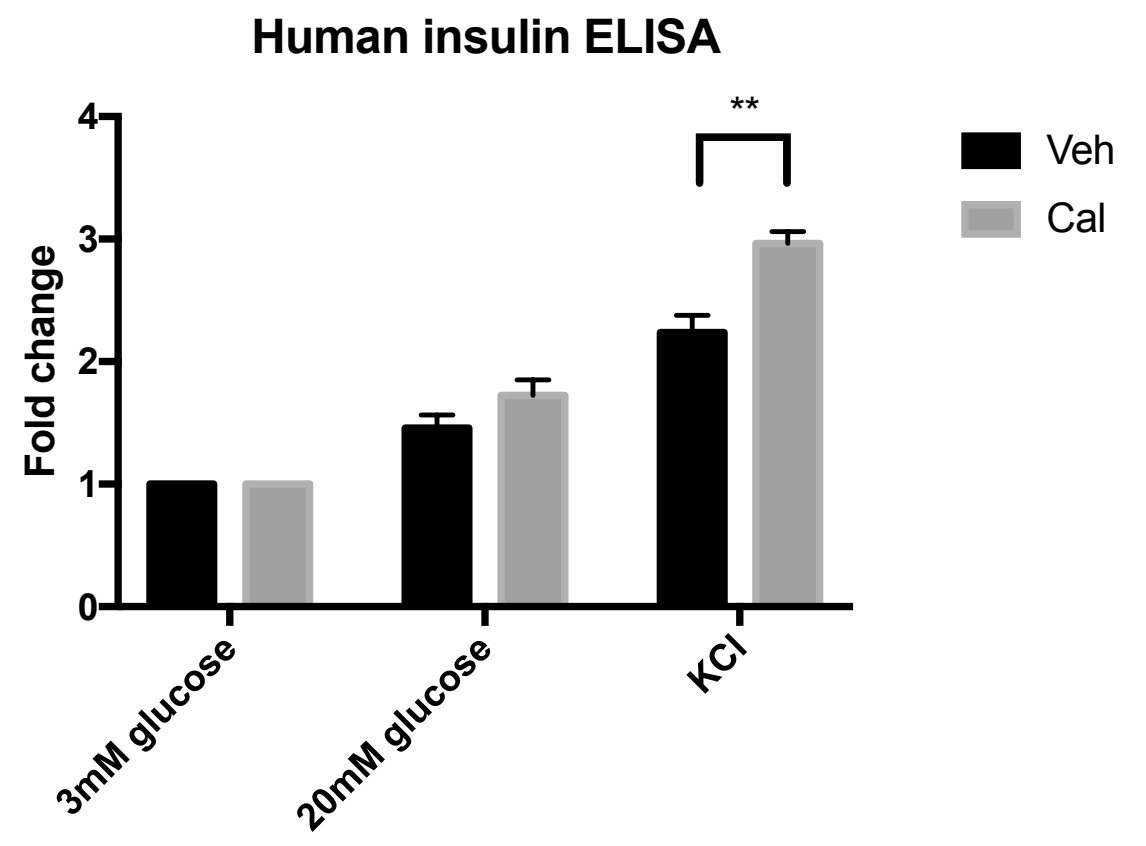

Supplement: NIHMS961666-supplement-7.pdf [file NIHMS961666-supplement-7.pdf]
